# Supplementary material for: Active Compounds in Zingiber officinale as Possible Redox Inhibitors of 5-Lipoxygenase Using an In Silico Approach
Source: MDPI journal article supplement (doi:10.3390/ijms23116093), 2022-05-29
Supplement: s1 [file s1]

**Supplementary Table S1.** Coupling energies (kcal/mol) between ligands and 5-LOX

| Compound                                     | $\Delta G$ (Kcal/mol)* |
|----------------------------------------------|------------------------|
| 6-gingerol                                   | -5.9                   |
| 6-shogaol                                    | -6.2                   |
| <b>Note:</b> *Binding free energy (Kcal/mol) |                        |
